# Supplementary material for: Density-Controlled Growth of ZnO Nanowalls for High-Performance Photocatalysts
Source: MDPI journal article supplement (doi:10.3390/ma15249008), 2022-12-16
Supplement: s1 [file s1]

# Density-Controlled Growth of ZnO Nanowalls for High-Performance Photocatalysts

Yu-Cheng Chang <sup>1,\*</sup>, Ying-Ru Lin <sup>1,2</sup>, Sheng-Wen Chen <sup>1</sup> and Chia-Man Chou <sup>3,4,5,\*</sup>

<sup>1</sup> Department of Materials Science and Engineering, Feng Chia University, Taichung 407102, Taiwan

<sup>2</sup> Department of Materials Science and Engineering, National Yang Ming Chiao Tung University, Hsinchu 30010, Taiwan

<sup>3</sup> Department of Surgery, Taichung Veterans General Hospital, Taichung 40705, Taiwan

<sup>4</sup> College of Medicine, National Yang Ming Chiao Tung University, Taipei 11221, Taiwan

<sup>5</sup> Department of Post-Baccalaureate Medicine, National Chung Hsing University, Taichung 40227, Taiwan

\* Correspondence: yuchchang@fcu.edu.tw (Y.-C.C.); cmchou@vghtc.gov.tw (C.-M.C.)

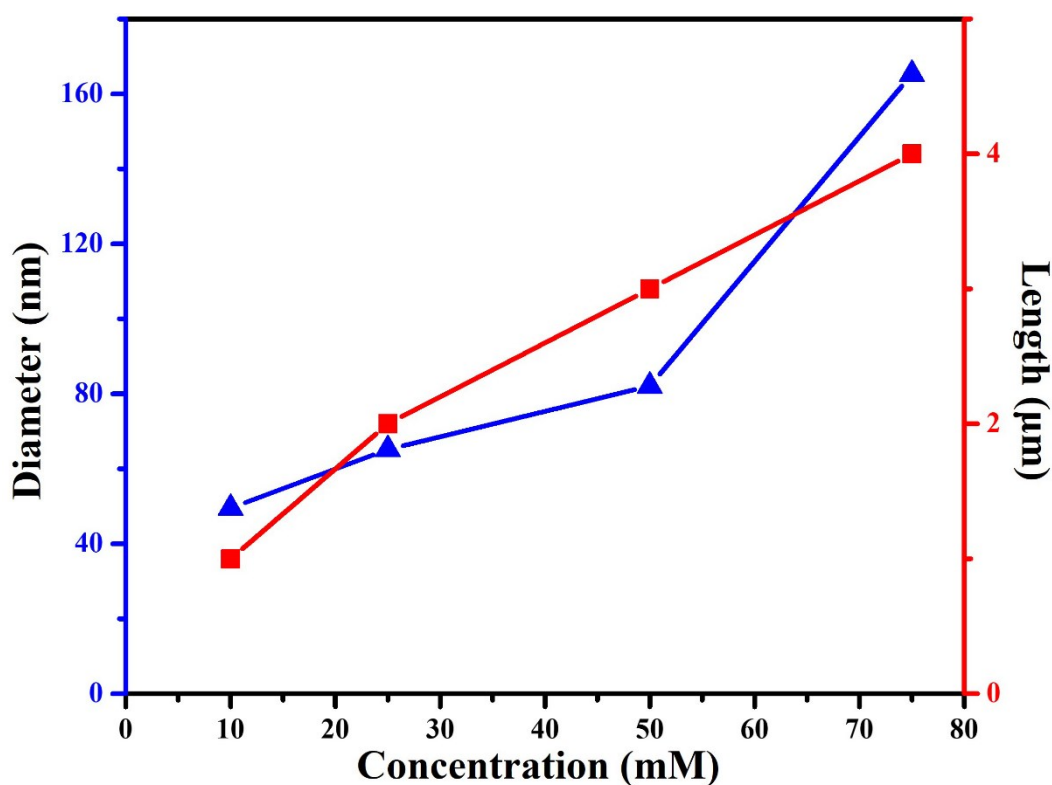

**Figure S1.** The diameter and length of ZnO nanowires were plotted as a function of the different concentrations of ZnO precursors.

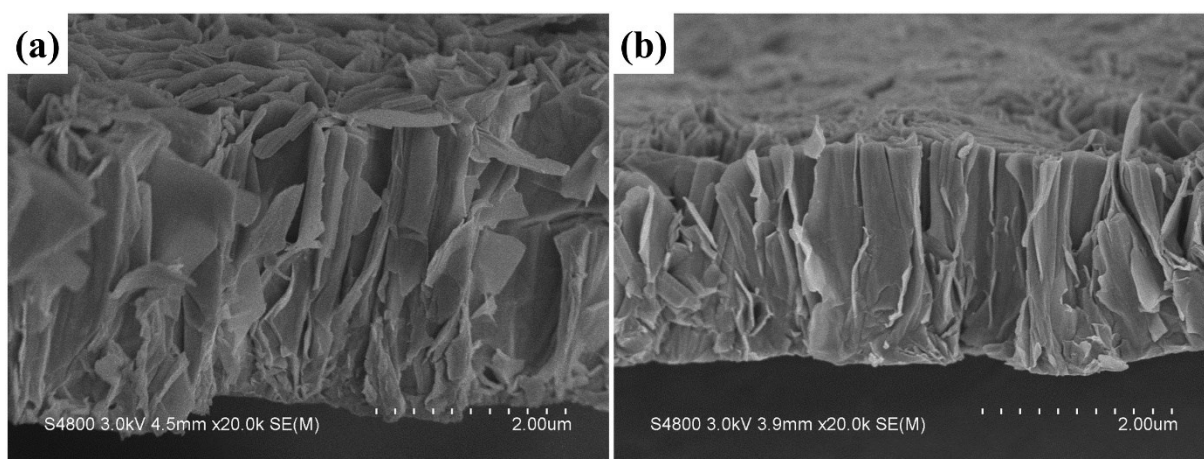

**Figure S2.** The cross-sectional FESEM images of the ZnO nanowalls synthesized at the different concentrations of ZnO precursors. The concentrations of ZnO precursors are (a) 50 and (b) 75 mM, respectively.
